# Supplementary material
Source: PubMed Central journal article supplement (PMC3540246)
Supplement: mmc1.pdf [file mmc1.pdf]

**Cations as switches of amyloid mediated membrane disruption mechanisms: Calcium and IAPP**

Michele F.M. Sciacca<sup>1</sup>, Danilo Milardi<sup>2</sup>, Grazia M.L. Messina<sup>3</sup>, Giovanni Marletta<sup>3</sup>, Jeffrey R. Brender<sup>1</sup>, Ayyalusamy Ramamoorthy<sup>1\*</sup> and Carmelo La Rosa<sup>3\*</sup>

<sup>1</sup> Biophysics and Department of Chemistry, University of Michigan, Ann Arbor, MI 48109-1055, USA

<sup>2</sup>Istituto di Biostrutture e Bioimmagini CNR-UOS Catania Viale A. Doria 6, 95125 Catania, Italy

<sup>3</sup>Department of Chemical Sciences, University of Catania, Viale A. Doria 6, 95125 Catania, Italy

\*Corresponding Authors:

Carmelo La Rosa, E-mail: [clarosa@unict.it](mailto:clarosa@unict.it), Tel.: +39-(0)95-7385114; Fax: +39-(0)95-580138

Ayyalusamy Ramamoorthy, E-mail: [ramamoor@umich.edu](mailto:ramamoor@umich.edu), Tel.: (734)647-6572; Fax: (734)764-3323

## Supporting methods

*ThT fluorescence assays:* The kinetics of peptides amyloid formation were measured using the increase of fluorescence emission upon binding of the commonly used amyloid specific dye thioflavin T. Samples were prepared by adding 1  $\mu\text{L}$  of the peptide stock solution to 100  $\mu\text{L}$  of 10 mM HEPES solution, 100 mM NaCl, pH 7.4, containing 10  $\mu\text{M}$  ThT (final peptide concentration was 2.0  $\mu\text{M}$ ) in the presence of LUVs at the concentration of 200  $\mu\text{M}$ . Where present, calcium ion concentrations were 50, 100, 200 or 400  $\mu\text{M}$ . Experiments were carried out in Corning 96 well non binding surface plates. Time traces were recorded using Biotek Synergy 2 plate reader using a 440 nm excitation filter and a 485 emission filter at room temperature, shaking samples for 10 seconds before each read. All measures were done in triplicate.

## Supporting figures

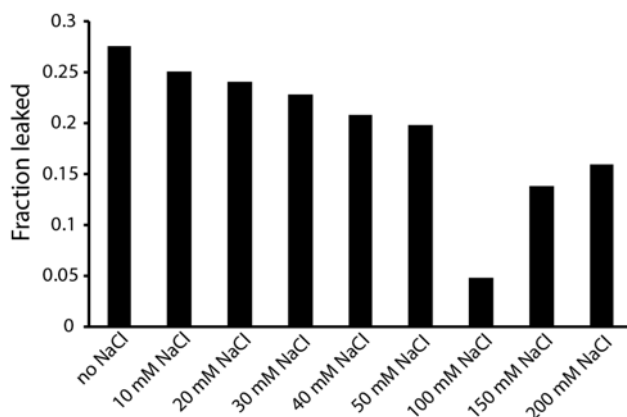

**Figure S1. Dye release from model membranes at different NaCl concentrations.** Dye release from 200  $\mu\text{M}$  LUVs of POPC/POPS (molar ratio 7/3) after 24 hours in the presence of the indicated concentrations of NaCl in the outside buffer. All experiments were made in 10 mM HEPES buffer, pH 7.4 at 25°C. The concentration of 6-carboxyfluorescein inside the LUVs is 70 mM and no NaCl is present in the inside buffer. Results are the average of three experiments.

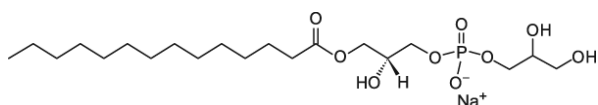

**Figure S2. Molecular structure of LysoPG.**

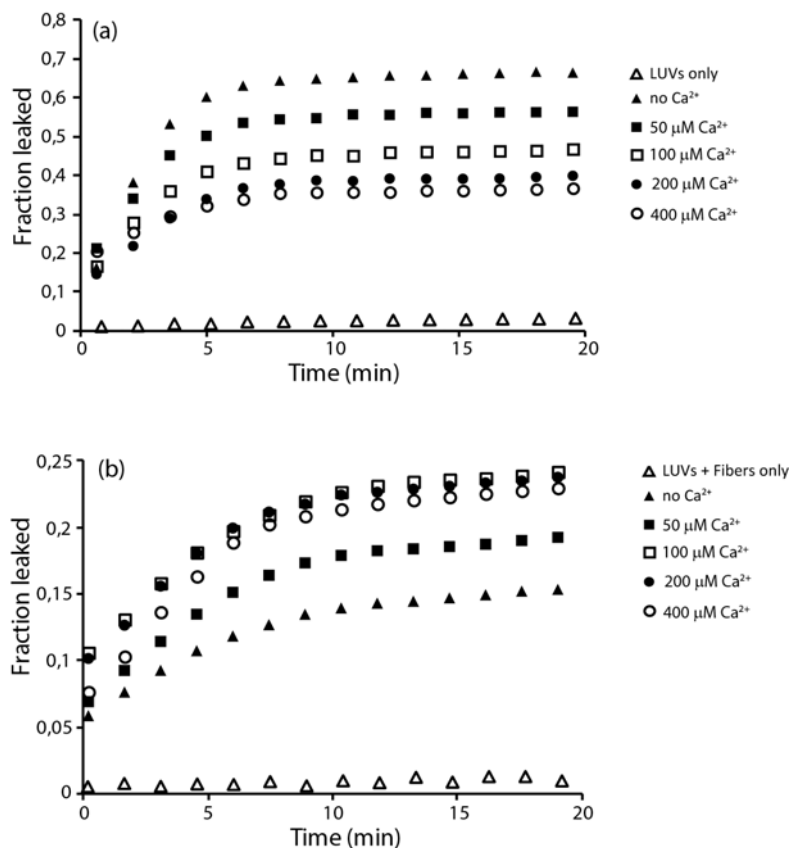

**Figure S3. Dye release from model membranes induced by hIAPP in the presence and absence of calcium ions.** Kinetics of dye release from 200  $\mu\text{M}$  LUVs of POPC/POPS (molar ratio 7/3) in the absence (a) or presence (b) of 1  $\mu\text{M}$  preformed hIAPP fibers, induced by 2  $\mu\text{M}$  of monomeric hIAPP at the  $\text{Ca}^{2+}$  concentrations indicated. All experiments were made in 10 mM HEPES buffer, 100 mM NaCl, pH 7.4 at 25°C. Results are the average of three experiments.

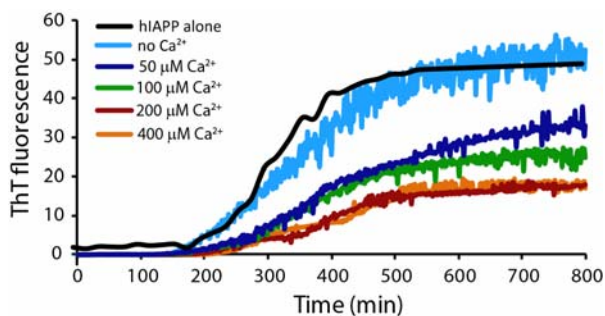

**Figure S4. Kinetics of hIAPP fiber formation measured by the ThT fluorescence assay.** ThT fluorescence of 2  $\mu\text{M}$  hIAPP in the presence of 200  $\mu\text{M}$  of LUVs POPC/POPS (molar ratio 7/3) in the presence of the indicated concentrations of  $\text{Ca}^{2+}$ . All experiments were made in 10 mM HEPES buffer, 100 mM NaCl, pH 7.4 at 25°C. Results are the average of three experiments.

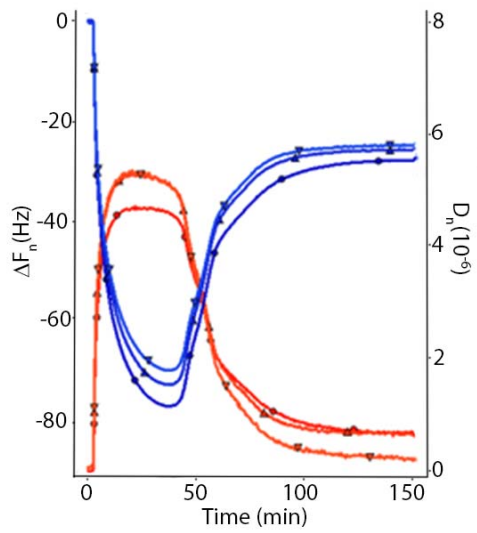

**Figure S5. QCM-D analysis of the formation of supported lipid bilayer.** QCM-D curves

of frequency (blue curves) and dissipation (red curves) shifts for POPC/POPS (molar ratio 7/3) after vesicle adsorption (from 0 to ~40 minutes), rupture (~40 to ~90 minutes) and SLB formation (after ~90 minutes).

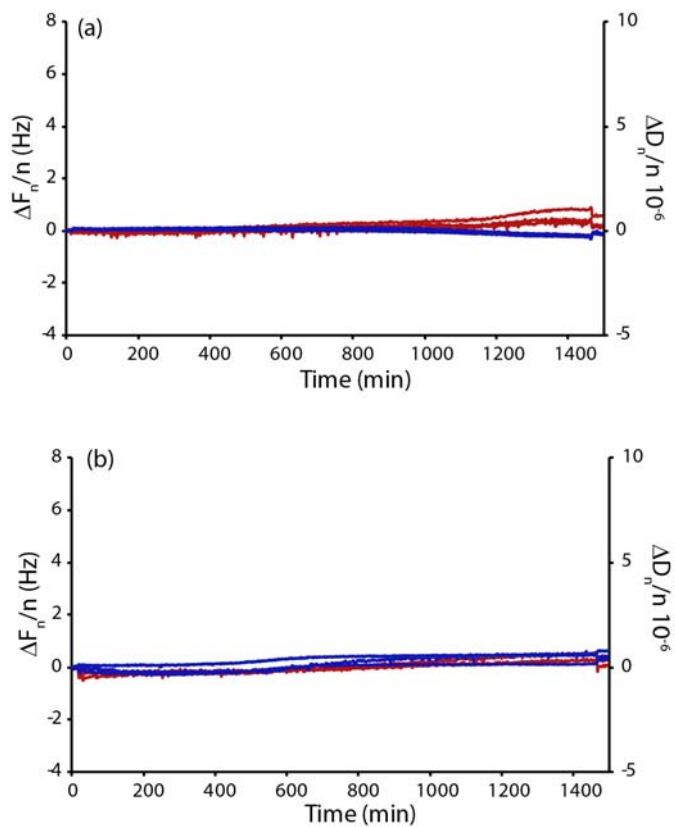

**Figure S6. QCM-D analysis of the interaction of rat IAPP (rIAPP) and supported lipid bilayer.** QCM-D traces of the interaction of POPC/POPS (molar ratio 7/3) SLB with rIAPP in the absence (a) or in presence (b) of 100  $\mu\text{M}$  of  $\text{Ca}^{2+}$  ions. (Blue lines:  $\Delta F_3$ ,  $\Delta F_5$  and  $\Delta F_7$ ; red lines: D3, D5 and D7). All experiments were made in 10 mM HEPES buffer, 100 mM NaCl, pH 7.4.

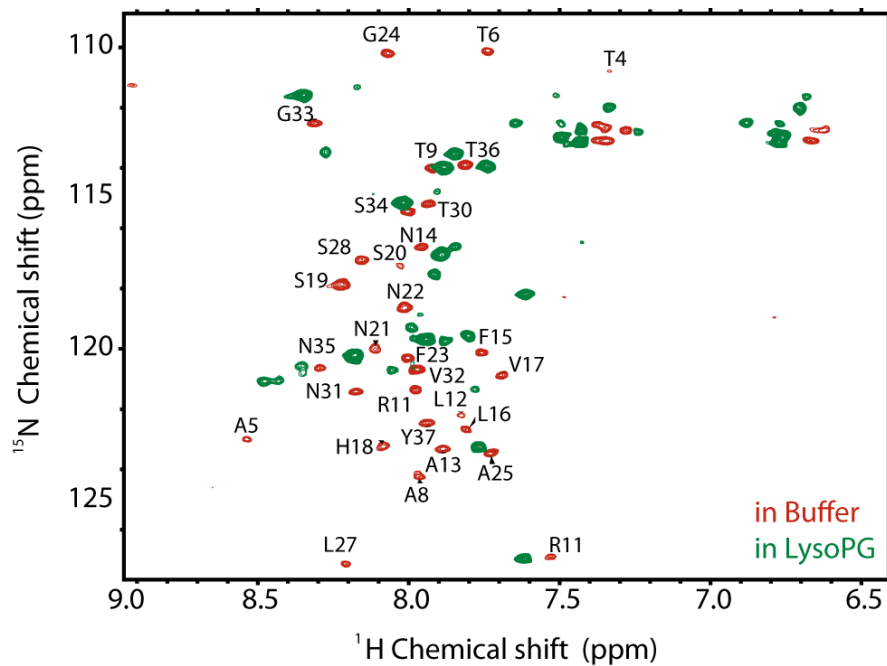

**Figure S7. 2D  $^{15}\text{N}$ - $^1\text{H}$  SOFAST-HMQC NMR spectra of hIAPP with and without LysoPG.** 2D  $^{15}\text{N}$ - $^1\text{H}$  SOFAST-HMQC spectra of hIAPP in the presence (green) and absence (red) of 25 mM LysoPG. Resonance assignment corresponds to hIAPP in the absence of LysoPG.

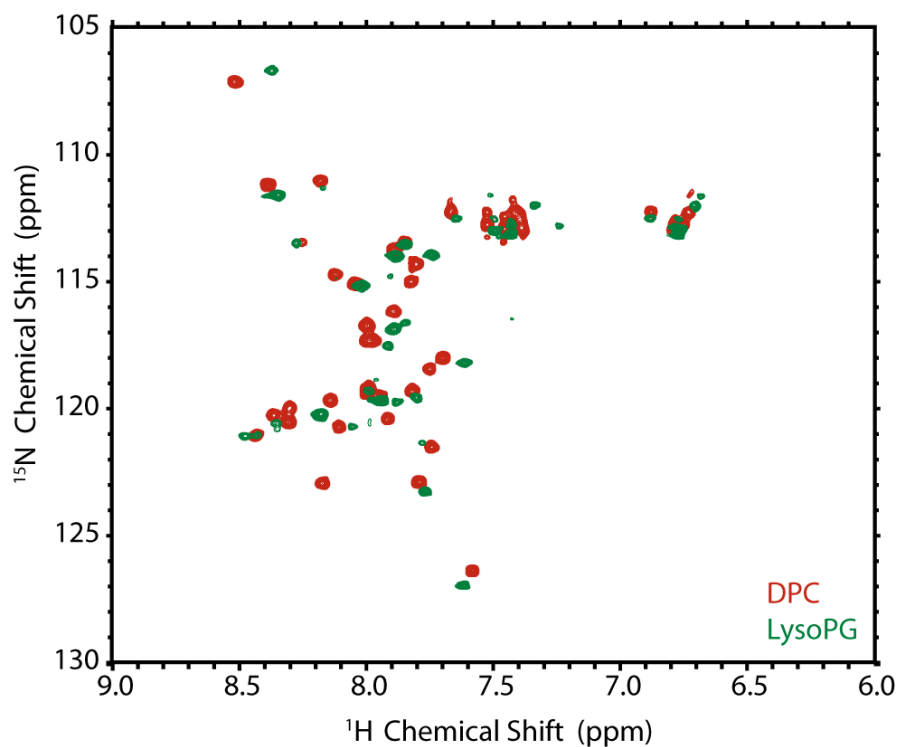

**Figure S8. 2D  $^{15}\text{N}$ - $^1\text{H}$  SOFAST-HMQC NMR spectra of hIAPP bound to DPC and LysoPG.** 2D  $^{15}\text{N}$ - $^1\text{H}$  SOFAST-HMQC spectra of hIAPP bound to LysoPG (green) and DPC (red) micelles.

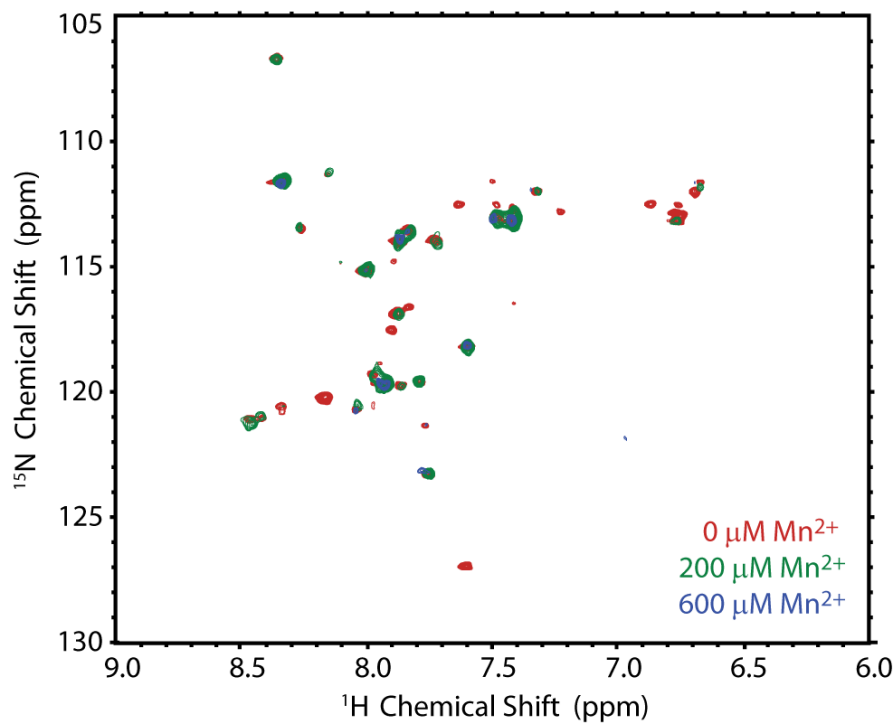

**Figure S9. Paramagnetic quenching of hIAPP bound to LysoPG in the absence of  $\text{Ca}^{2+}$ .** 2D  $^{15}\text{N}$ - $^1\text{H}$  SOFAST-HMQC spectra of hIAPP bound to 25 mM LysoPG with the indicated concentration of  $\text{MnCl}_2$ .

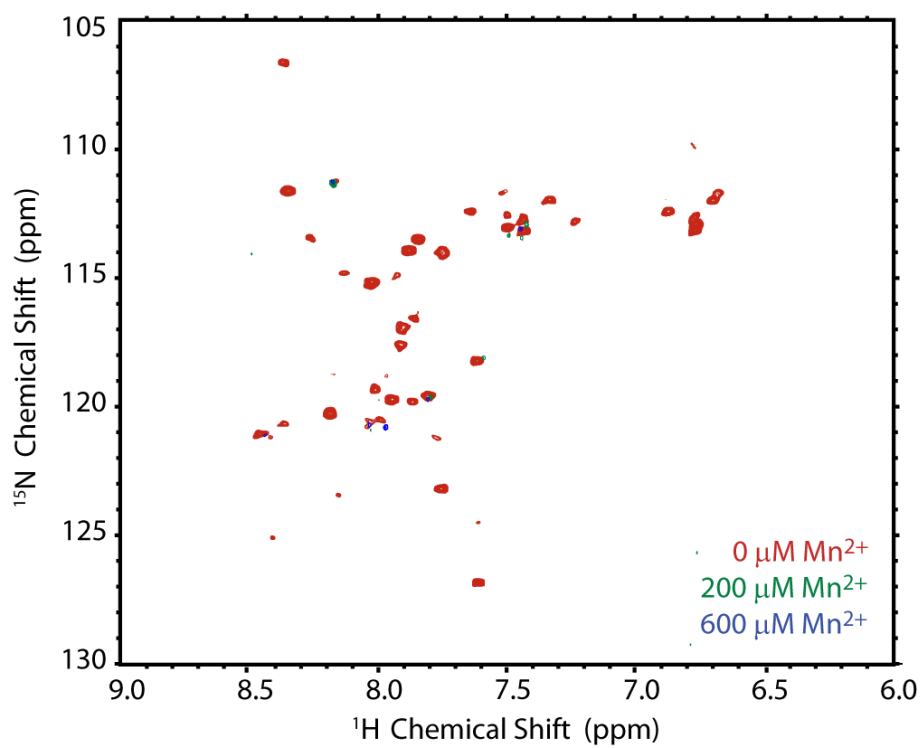

**Figure S10. Paramagnetic quenching of hIAPP bound to LysoPG in the presence of  $\text{Ca}^{2+}$ .** 2D  $^{15}\text{N}$ - $^1\text{H}$  SOFAST-HMQC spectra of hIAPP bound to 25 mM LysoPG in the presence of 12.5 mM  $\text{CaCl}_2$  with the indicated concentrations of  $\text{MnCl}_2$ .



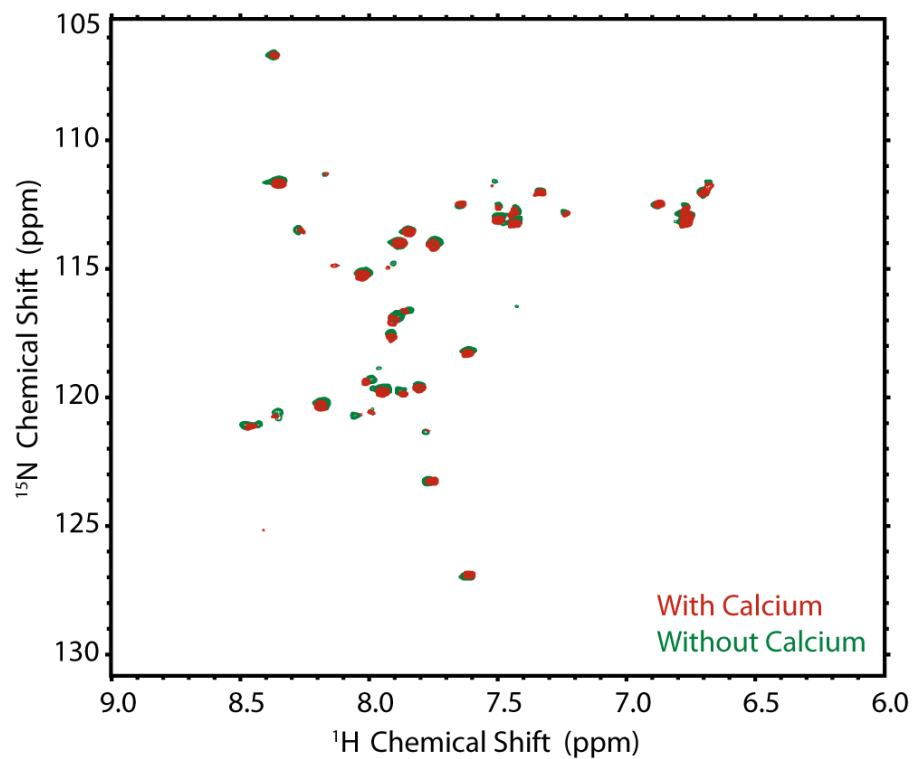

**Figure S11. 2D  $^{15}\text{N}$ - $^1\text{H}$  SOFAST-HMQC NMR spectra of hIAPP bound to LysoPG with and without  $\text{Ca}^{2+}$ .** 2D  $^{15}\text{N}$ - $^1\text{H}$  SOFAST-HMQC spectra of hIAPP bound to 25 mM LysoPG with (red) and without (green) 12.5 mM  $\text{CaCl}_2$ .

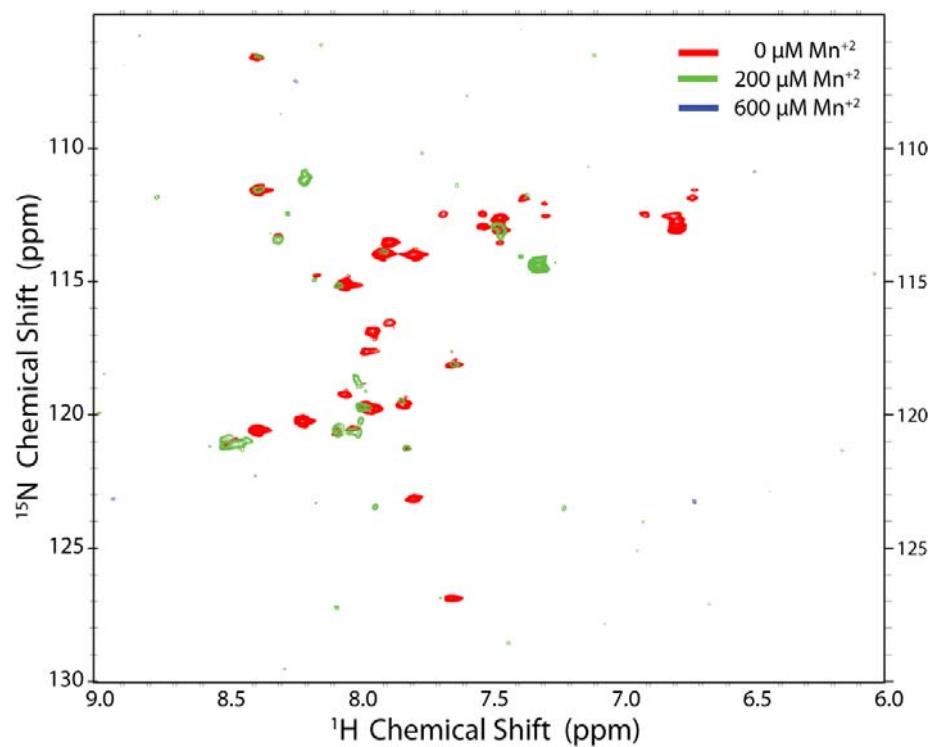

**Figure S12. Paramagnetic quenching of hIAPP bound to LysoPG in the presence of  $Mg^{2+}$ .** 2D  $^{15}N$ - $^1H$  SOFAST-HMQC spectra of hIAPP bound to 25 mM LysoPG in the presence of 12.5 mM  $MgCl_2$  with the indicated concentrations of  $MnCl_2$ .

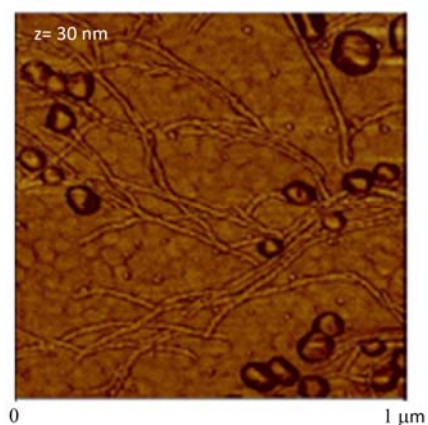

**Figure S13. AFM images of hIAPP on Mica after 24h.**

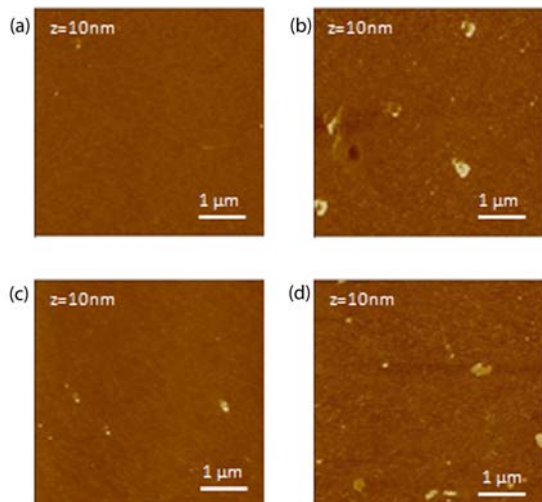

**Figure S14. AFM images of rIAPP on SLB with and without calcium ions.** (a) POPC/POPS (molar ratio 7/3) SLB after exposure to 2  $\mu\text{M}$  rIAPP for 2 hours; (b) POPC/POPS (molar ratio 7/3) SLB exposed to 2  $\mu\text{M}$  rIAPP for 24 hours; (c) POPC/POPS (molar ratio 7/3) SLB after exposure to 2  $\mu\text{M}$  rIAPP and 100  $\mu\text{M}$   $\text{Ca}^{2+}$  ions for 2 hours; (d) POPC/POPS (molar ratio 7/3) SLB, after exposure to 2  $\mu\text{M}$  rIAPP and 100  $\mu\text{M}$   $\text{Ca}^{2+}$  ions for 24 hours.
